# Supplementary material for: Transforming Healthcare Education: Integrating the WHO Rehabilitation Competencies Framework into Interprofessional Curricula
Source: Research Square preprint supplement (doi:10.21203/rs.3.rs-7601827/v1), 2025-11-11
Supplement: Supplementary file 1 [file 981ee29a59980017100b8ddd.docx]

**Script Faculty Interview**

Good _____________________, Welcome to this semi structured interview exploring “the WHO Rehabilitation Competencies Framework (RCF) to advance interprofessional curricula in the academy”. My name is Angela Lis and along with the study research assistant XXXX we are looking forward to hearing your insights.

First, we would like to thank you so much for your willingness to participate in this interview. Before we start, I want to confirm that you have signed and returned the informed consent form and had the chance to review the power point presentation sent via email.

During this interview, to maintain confidentiality I will avoid using your name and if at some point in time this happens, it will be “replace by a subject number” in the transcripts. This interview is not being recorded but automated transcripts via Teams and personal notations will be made by the interviewer to facilitate and ensure accurate analysis of your “words”. Although your “words” will be transcribed verbatim, they will not be linked to your identity and will always remain anonymous. If at any time you would like to stop the interview, please let me know and we will do so without any recrimination.

Do you have any questions so far?

The main objective of today’s interview is to start a dialogue, confirm the results of the survey and identify the competencies and related behaviors of interest across all SHMS disciplines, with focus on your perception of your program specific needs. Your perspective as FACULTY about how you would “envision” an interprofessional learning experience to facilitate the competencies related to the “Practice Domain” is of great importance to the team.

We encourage you to think about your own experiences as FACULTY MEMBER, in the field of (PT, OT, AT, SLP, PA) as well as your program needs, priorities and resources. If after the interview you reflect on your answers and want to bring up new ideas, please save those thoughts and share them with us at your next interview.

Do you have any questions? Or Can we proceed?

I first would like to ask a few questions that will give us a general idea of your background:

A1 What professional discipline do you teach in primarily?

A2 Do you teach across disciplines? YES/ NO

A3 How long have you been teaching fulltime?

A4 Do you hold an advanced degree? YES/NO

A5 If you hold an advanced degree is it in higher education? YES/NO

A6 Have you participated in any of the existing IPE experiences? YES/NO

Q1. You had the chance to review the power point presentation. Tell me about your thoughts when you reviewed the power point presentation and saw the results of the survey.

Can you elaborate on that?

In the presentation you noticed that the Domain of Practice was rated as the highest priority, Do you have any insights of why you think this was found?

How does it relate to your rehabilitation discipline (PT, OT, AT, SLP, PA)? Why? Can you elaborate a bit more on that?

Based on your experience as FACULTY in your program, why is this a priority or a need? Can you talk a bit more about your experience?

How have you experienced the need of this (competency) as a FACULTY in SHMS?

Q2. You can also see in the presentation that although Practice was the highest priority other domains such as Professionalism were also of a high importance. What are your thoughts about this? Can you elaborate? (I,e: example)

Have you experienced the need of learning experiences related to the professionalism competencies? Can you elaborate on that?

Interesting when combining high/highest priority and analyzing all stakeholders, learning and development emerged as important as well. What are your thoughts about these results? Could you share with us any insights about why this might have occurred?

Have you experienced the need of learning experiences related to the professionalism competencies? Can you elaborate on that?

Q3. Let’s now talk about your program and the competency found of highest priority.

Each program has a specific mission, for your program it says the mission is to prepare competent, autonomous practitioners who are capable in inter-professional care and support the best practices of (PT, OT, AT, SLP, PA). How does the result of “PRACTICE” domain of being a priority/need for the SHMS community aligns with the mission/vision of your program?

What if you have the chance to collaborate in designing a learning experience to promote “The practice domain”. Tell me, How do you envision this experience to facilitate the mission/vision of your program?

Now, I will appreciate if you think about your experience as a faculty member of your program:

How do you feel about the results of the survey and your program accreditation standards?

How does creating an interprofessional experience to facilitate practice related competencies respond to or reinforce the accreditation needs of your program?

What if you have the chance to collaborate in designing a learning experience to promote the practice domain. Tell me, how do you envision this experience to facilitate the mission/vision of your program?

Now, I will appreciate if you think about your experience within SHMS rather than your perception of importance within your profession. The practice domain that was rated as of highest priority encompass a series of specific competencies such as:

1. Places the person and their family at the center of practice; examples of related behaviors are: Supports the person and their family to be active partners in their rehabilitation, including decision-making, goals, needs, preferences, and barriers to treatment.

2. Establishes a collaborative relationship with the person and their family

3. Communicates effectively with the person, their family, and their health-care team

4. Adopts a rigorous approach to problem solving and decision-making

5. Works within scope of practice and competence

Is creating a specific interprofessional learning experience aimed at improving those competencies redundant? Can you give me an example?

Could you further explain why?

If redundant, Can you give me an example? How do you feel about those existing experiences?

Can you give me an example of any specific areas that feel “missing” or in “need of reinforcement”?

Now reflect on the specific competencies related to professionalism, based on your experience within your program, Is creating a specific interprofessional learning experience aimed at improving professionalism competencies redundant? Here are some examples of such competencies.

1. Ethical conduct for instance; Respects privacy and maintains confidentiality or Recognizes and works to mitigate potentially harmful impacts of personal biases and beliefs;

2. Collaborative working

3. Manages professional responsibilities

[If redundant] Could you further explain why?

Can you give me an example?

Can you give me an example of any specific areas that feel “missing” or in “need of reinforcement”?

Q4. Having now the chance to collaborate in designing this learning experience what would you like to happen? - Can you further elaborate?

How do you envision the interprofessional experience that we plan to design?

What would you like to experience?

How does your answer change considering the range of environments and experiences that learners could be exposed to, and SHMS resources?

For the envision IPE experience, imagining the best conditions, what will make it a “successful and meaningful” experience? Successful and meaningful is responding to your program faculty and students’ needs, and sustainability of the experience.

Q5. What type of resources would be required? Think about your own program needs and resources.

Clinical, technical resources and Institutional readiness including trained faculty, accessibility for real-life learning experience, institutional support.

**Script Student Interview**

Good _____________________, Welcome to this semi structured interview exploring “the WHO Rehabilitation Competencies Framework (RCF) to advance interprofessional curricula in the academy”. My name is Angela Lis and along with the study research assistant Sarah Roux we are looking forward to hearing your insights.

First, we would like to thank you so much for your willingness to participate in this interview. Before we start, I want to confirm that you have signed and returned the informed consent form and had the chance to review the power point presentation sent via email.

During this interview, to maintain confidentiality I will avoid using your name and if at some point in time this happens, it will be “replace by a subject number” in the transcripts. This interview is not being recorded but automated transcripts via Teams and personal notations will be made by the interviewer to facilitate and ensure accurate analysis of your “words”. Although your “words” will be transcribed verbatim, they will not be linked to your identity and will always remain anonymous. If at any time you would like to stop the interview, please let me know and we will do so without any recrimination.

Do you have any questions so far?

The main objective of today’s interview is to start a dialogue, confirm the results of the survey and identify the competencies and related behaviors of interest across all SHMS disciplines, with focus on your perception of your program specific needs. Your perspective as student about how you would “envision” an interprofessional learning experience to facilitate the competencies related to the “Practice Domain” is of great importance to the team.

We encourage you to think about your own experiences as student, in the field of __________________as well as your program needs, priorities and resources. If after the interview you reflect on your answers and want to bring up new ideas, please save those thoughts and share them with us at your next interview.

Do you have any questions? Or Can we proceed?

I first would like to ask What is your current year as SHMS student?

Have you participated in any of the IPE experiences?

Q1. You had the chance to review the power point presentation. Tell me about your thoughts when you reviewed the power point presentation and saw the results of the survey.

Can you elaborate on that?

In the presentation you noticed that the Domain of Practice was rated as the highest priority, Do you have any insights of why you think this was found?

How does it relate to your rehabilitation discipline? Why? Can you elaborate a bit more on that?

Based on your experience as student in your program, why do you think this is a priority or a need? Can you talk a bit more about your experience?

How have you experienced the need of this (competency) as a student?

Q2. You can also see in the presentation that although Practice was the highest priority other domains such as Professionalism were also of a high importance. What are your thoughts about this? Can you elaborate? (I,e: example)

Have you experienced the need of learning experiences related to the professionalism competencies? Can you elaborate on that?

Interesting when combining high/highest priority and analyzing all stakeholders, learning and development emerged as important as well. What are your thoughts about these results? Could you share with us any insights about why this might have occurred?

Have you experienced the need of learning experiences related to the professionalism competencies? Can you elaborate on that?

Q3. Let’s now talk about your program and the competency found of highest priority.

Each program has a specific mission, the (PT, OT, AT, SLP, PA) program says the mission is to prepare competent, autonomous practitioners who are capable in inter-professional care and support the best practices of (PT, OT, AT, SLP, PA). How does the result of “PRACTICE” domain of being a priority/need for the SHMS community aligns with the mission/vision of your program?

What if you have the chance to collaborate in designing a learning experience to promote “The practice domain”. Tell me, How do you envision this experience to facilitate the mission/vision of your program?

Now, I will appreciate if you think about your experience within SHMS rather than your perception of importance within your profession. The practice domain that was rated as of highest priority encompass a series of specific competencies such as:

1. Places the person and their family at the center of practice; examples of related behaviors are: Supports the person and their family to be active partners in their rehabilitation, including decision-making, goals, needs, preferences, and barriers to treatment.

2. Establishes a collaborative relationship with the person and their family

3. Communicates effectively with the person, their family, and their health-care team

4. Adopts a rigorous approach to problem solving and decision-making

5. Works within scope of practice and competence

Is creating a specific interprofessional learning experience aimed at improving those competencies redundant? Can you give me an example?

Could you further explain why?

If redundant,

Can you give me an example? How do you feel about those existing experiences?

Can you give me an example of any specific areas that feel “missing” or in “need of reinforcement”?

Now reflect on the specific competencies related to professionalism, based on your experience within your program, Is creating a specific interprofessional learning experience aimed at improving professionalism competencies redundant? Here are some examples of such competencies.

1. Ethical conduct for instance; Respects privacy and maintains confidentiality or Recognizes and works to mitigate potentially harmful impacts of personal biases and beliefs;

2. Collaborative working

3. Manages professional responsibilities

[If redundant] Could you further explain why?

Can you give me an example?

Can you give me an example? Of any specific areas that feel “missing” or in “need of reinforcement”?

Q4. Having now the chance to collaborate in designing this learning experience what would you like to happen? - Can you further elaborate?

How do you envision the interprofessional experience that we plan to design?

What would you like to experience?

How does your answer change considering the range of environments and experiences that learners could be exposed to, and SHMS resources?

For the envision IPE experience, imagining the best conditions, what will make it a “successful and meaningful” experience? Successful and meaningful is responding to your program faculty and students’ needs, and sustainability of the experience.

Q5. What type of resources would be required? Think about your own program needs and resources.

Clinical, technical resources and Institutional readiness including trained faculty, accessibility for real-life learning experience, institutional support.
